# Supplementary material for: Variations of atmospheric PAHs concentrations, sources, health risk, and direct medical costs of lung cancer around the Bohai Sea under the background of pollution prevention and control in China
Source: Copernicus journal article supplement (doi:10.5194/egusphere-2023-1995), 2023-09-12
Supplement: Supplementary file 1 [file egusphere-2023-1995-supplement.pdf]

1 **Supporting Information for**  
2 **Variations of atmospheric PAHs concentrations, sources, health risk,**  
3 **and direct medical costs of lung cancer around the Bohai Sea under**  
4 **the background of pollution prevention and control in China**

5

6 Wenwen Ma<sup>1,4,5</sup>, Rong Sun<sup>1,4,\*</sup>, Xiaoping Wang<sup>3</sup>, Zheng Zong<sup>1,4</sup>, Shizhen Zhao<sup>2</sup>, Zeyu  
7 Sun<sup>1,4,5</sup>, Chongguo Tian<sup>1,4,\*</sup>, Jianhui Tang<sup>1,4</sup>, Song Cui<sup>6</sup>, Jun Li<sup>2</sup>, Gan Zhang<sup>2</sup>

8

9 <sup>1</sup> CAS Key Laboratory of Coastal Environmental Processes and Ecological  
10 Remediation, Yantai Institute of Coastal Zone Research, Chinese Academy of Sciences,  
11 Yantai Shandong 264003, P.R. China

12 <sup>2</sup> State Key Laboratory of Organic Geochemistry, Guangzhou Institute of Geochemistry,  
13 Chinese Academy of Sciences, Guangzhou, 510640, China

14 <sup>3</sup> Ludong University, Yantai, 264025, China

15 <sup>4</sup> Shandong Key Laboratory of Coastal Environmental Processes, Yantai Shandong  
16 264003, P.R. China

17 <sup>5</sup> University of Chinese Academy of Sciences, Beijing, 100049, China

18 <sup>6</sup> International Joint Research Center for Persistent Toxic Substances (IJRC-PTS),  
19 School of Water Conservancy and Civil Engineering, Northeast Agricultural University,  
20 Harbin 150030, China

21

22 *Correspondence to:* Rong Sun ([rsun@yic.ac.cn](mailto:rsun@yic.ac.cn)) and Chongguo Tian ([cgtian@yic.ac.cn](mailto:cgtian@yic.ac.cn))

23

## Content

24

25 The supplemental material has 31 pages and includes the following items:

### 26 Texts

27 **Text S1.** Calculation method of uncertainty input file

28 **Text S2.** Positive Matrix Factorization (PMF)

29 **Text S3.** Source identification

### 30 Tables

31 **Table S1.** Sampling information for 12 sampling sites (geographical location and  
32 sampling days)

33 **Table S2.** The ring number, method detection limits (MDLs), TEF, and other  
34 information for PAHs in this study

35 **Table S3.** The annual concentration of PAHs around Bohai Sea (Mean±SD, ng m<sup>-3</sup>)

36 **Table S4.** Significance level between annual mean concentration of PAHs by t-test

37 **Table S5.** The seasonal concentration of PAHs (Mean±SD, ng m<sup>-3</sup>)

38 **Table S6.** Significant difference between seasonal PAHs concentration and ring number  
39 by t-test

40 **Table S7.** The annual average daily concentration of 15 PAHs at 12 sampling sites from  
41 June 2014 to May 2019 (Mean±SD, ng m<sup>-3</sup>)

42 **Table S8.** Pearson correlation coefficients of the proportion of different ring number of  
43 PAHs among 12 sampling sites from June 2014 to May 2019

44 **Table S9.** Pearson correlation coefficient of 20 seasonal concentrations of PAHs at  
45 Tianjin and the four adjacent sites

46 **Table S10.** VARIMAX-rotated factor loadings of PCA of atmospheric PAHs at the BS.

47 **Table S11.** Characteristic PAH molecular diagnostic ratios

48 **Table S12.** The seasonal mean concentration of PM<sub>2.5</sub> (μg m<sup>-3</sup>) and PAHs (ng m<sup>-3</sup>)

49 **Table S13.** The Pearson correlation of concentration between PM<sub>2.5</sub> and PAHs

50 **Table S14.** The annual mean of ILCR caused by PAHs exposure around the BS and TJ  
51 from June 2014 to May 2019

52 **Table S15.** Annual average TEQ of atmospheric PAHs around the BS from June 2014

53 to May 2019

54 **Table S16.** The direct medical costs of lung cancer caused by PAHs exposure around  
55 the BS

56 **Table S17.** The direct medical costs of lung cancer caused by PAHs exposure at TJ

57 **Figures**

58 **Fig. S1.** The locations of the 12 sampling sites around the BS.

59 **Fig. S2.** The five-year average fractions of different rings of  $\sum_{15}$  PAHs at 12 sampling  
60 sites.

61 **Fig. S3.** The annual average concentration of PAHs sub-rings around the BS.

62 **Fig. S4.** The backward trajectory by Hysplit model of the northern Bohai Sea sites in  
63 winter.

64 **Fig. S5.** Factor profiles of PAHs by the PMF model.

65 **Fig. S6.** The relationship between predicted and measured concentrations of 228  
66 samples analyzed by PMF (a) and (b).

67 **Fig. S7.** The average contributions of the five sources of PAHs at 12 sites around the  
68 BS.

69 **Fig. S8.** The pollutants emissions of motor vehicle around the BS within five years.

70 **Fig. S9.** Seasonal contribution of coal combustion and vehicle emission for PAHs  
71 around the BS.

72

73 **Texts**

74 **Text S1. Calculation method of uncertainty input file**

75 The uncertainty of the variables was calculated based on the method detection  
76 limit (MDL) and the concentration of each sample:

77 (1) for samples of which concentration lower than MDL, 5/6 of MDL was used as  
78 the corresponding uncertainty (Kim et al., 2004);

79 (2) for samples of which concentration higher than MDL, the uncertainty was  
80 calculated as following (Chueinta et al., 2000):

81 
$$\sigma_{ij} = \frac{\text{MDL}}{3} + cx_{ij} \quad (1)$$

82 where  $\sigma_{ij}$  is the uncertainty, MDL is the Method Detection Limit,  $x_{ij}$  is the  
83 concentration of the  $i$ th variable in the  $j$ th sample.  $c$  is the constant (0.1 when  $x_{ij} >$   
84  $3\text{MDL}$ , 0.2 when  $x_{ij} < 3\text{MDL}$ ).

85 **Text S2. Positive Matrix Factorization (PMF)**

86 PMF analyses involve many details about the development of the data, decisions  
87 of what data to include/exclude, determination of a solution, and evaluation of  
88 robustness of that solution; reporting of PMF solutions and analyses vary widely. The  
89 profiles obtained from the modeling must have physically meaningful results, i.e., there  
90 must be evidence of the potential sources in the study area. The analysis of the Q value  
91 (indicates the agreement of the model fit;) and the  $r^2$  value (indicates the correlation  
92 between measured and estimated concentrations) can help to determine the best number  
93 of factors to be chosen for modeling (Wang et al., 2009). In this study, during the PMF  
94 analysis, the model was run for 3-7 factors and was always with random seeds. Finally,  
95 the five-factor solution was found to be ideal from 200 random bootstrapping and gave  
96 the most stable results and the most easily physically interpretable factors. The Q value  
97 (both robust and true) produced by this solution is close to the theoretical Q value,  
98 indicating that the PAHs data set in the modeling input provides appropriate uncertainty.  
99 The diagnostic regression  $R^2$  value for the overall concentration of 228 samples is  
100 0.9458, which is almost the same as the ratio of the predicted concentration of PMF to  
101 the measured concentration (Figure S6). It shows that the model results are good and

102 can be used as the basis for identifying the source of the target species. The  $r^2$  values  
103 also show a good correlation, and the values of the scaled residuals were in the  
104 recommended range (-1.5 to +1.5). These parameters indicate that the modeling has  
105 provided good fitting results and that there was no significant outlier.

### 106 **Text S3. Source identification**

107 Factor 1 accounted for 9.4% of the  $\Sigma_{15}$  PAHs, the main load was HMW-PAHs such  
108 as BaP (85.0%), InD (84.5%), BghiP (46.8%), which was similar to the composition  
109 profile of vehicle emissions (He et al., 2008). BghiP and InD are regarded as markers  
110 of gasoline engines (Wu et al., 2014). In addition, the Fla/(Fla+Pyr) and  
111 InD/(InD+BghiP) of factor 1 were 0.30 and 0.50, respectively, the value less than 0.5  
112 indicates that the main contribution came from vehicle exhaust (Characteristic PAH  
113 molecular diagnostic ratios were shown in Table S13 of SI). Therefore, factor 1 was  
114 interpreted gasoline vehicle emissions.

115 Factor 2 contributed 10.8% of the  $\Sigma_{15}$  PAHs, it was principally enriched the LMW-  
116 PAHs, Acy (57.6%) and Ace (77.4%). The composition of this factor was similar to the  
117 emission profiles of thermal power plant, steel plants and coking plants reported in the  
118 literature (Kong et al., 2013). Actually, there were industrial activities occurring in  
119 surrounding areas of the sites, such as sites in Tianjin, Liaoning, and Hebei Province.  
120 The inter-regional propagation of air masses has a great impact on the local  
121 concentration and distribution of PAHs in the air (Ma et al., 2010; Zhu et al., 2014)  
122 because of atmospheric diffusion and transport. Therefore, this factor was regarded as  
123 industrial processes.

124 Factor 3 accounted for the highest contribution of 49.6% of the  $\Sigma_{15}$  PAHs, it  
125 exhibited high loadings of Phe (93.8%), Ant (98.2%), Flu (62.5%) and moderate  
126 loadings of BaA (48.0%), Fla (26.2%), which corresponded to the profiles of  
127 incomplete combustion of coal (Huang et al., 2014; Chen et al., 2016). The ratios of  
128 Fla/(Fla+Pyr) and InD/(InD+BghiP) were 0.64 and 0.56, respectively, both greater than  
129 0.5, and showed the characteristics of coal combustion emissions. Therefore, factor 3  
130 was inferred to the coal combustion.

131 Factor 4 contributed 22.0%. Fla (59.3%) and Pyr (86.9%) are the dominant species,  
132 and moderate loadings of Chr (43.5%), which was similarly to the biomass emission  
133 components, such as straw, grass, wood (Shen et al., 2013; Ray et al., 2017). Maize and  
134 wheat are the two main crops in this area, and Fla and Pyr were the representative  
135 species of PAHs produced by straw burning (Jenkins et al., 1996). Therefore, factor 4  
136 was identified as biomass burning.

137 Similarly to factor 1, factor 5 (8.2%) was mainly characterized by HMW-PAHs,  
138 which are recommended to be substantially emitted by diesel engines (Guariero et al.,  
139 2014). Factor 5 exhibited high loadings of BbF (80.2%), BkF (71.8%), DahA (57.4%),  
140 BaA (47.2%). BbF and BkF were regarded as characteristic compounds of diesel  
141 emissions (Zhu et al., 2003; Riddle et al., 2007; He et al., 2008), the diesel vehicle or  
142 ship exhaust was considered to have high loading of BkF. And the Fla/(Fla+Pyr) and  
143 InD/(InD+Bghip) of factor 5 were 0.48 and 0.20, respectively, that was suggested to  
144 the diesel exhaust (Gong et al., 2018). Therefore, factor 5 was respectively classified as  
145 diesel vehicle exhaust.

**Tables**

**Table S1.** Sampling information for 12 sampling sites (geographical location and sampling days)

| Year               | Sampling Sites | Beihuang | Dalian | Donggang | Dongying | Gaizhou | Longkou | Laoting | Rongcheng | Tianjin | Xingcheng | Yantai | Zhuanghe |
|--------------------|----------------|----------|--------|----------|----------|---------|---------|---------|-----------|---------|-----------|--------|----------|
|                    | Abbr.          | BH       | DL     | DG       | DY       | GZ      | LK      | LT      | RC        | TJ      | XC        | YT     | ZH       |
|                    | Longitude (E)  | 120.92   | 121.53 | 123.89   | 118.92   | 122.16  | 120.27  | 119.06  | 122.69    | 117.44  | 120.58    | 121.43 | 122.99   |
|                    | Latitude (N)   | 38.4     | 38.87  | 39.85    | 37.5     | 40.25   | 37.69   | 39.34   | 37.39     | 38.84   | 40.47     | 37.59  | 39.64    |
| 2014               | Summer         | -        | 76     | 80       | 69       | 92      | -       | 79      | 87        | 75      | 77        | 71     | 77       |
| 2014               | Autumn         | 91       | 89     | 90       | 92       | 74      | 93      | 91      | 94        | 115     | 90        | 93     | 67       |
| 2014               | Winter         | -        | 98     | 84       | 92       | 88      | 91      | 92      | 89        | 89      | 94        | 91     | 88       |
| 2015               | Spring         | -        | 92     | 108      | 106      | 103     | 109     | 105     | 108       | 106     | 99        | 106    | 100      |
| 2015               | Summer         | 104      | 81     | 81       | 82       | 81      | 82      | 81      | 82        | 81      | 82        | 82     | 81       |
| 2015               | Autumn         | 76       | 97     | 97       | 97       | 102     | 97      | 97      | 97        | 98      | 97        | 101    | 97       |
| 2015               | Winter         | -        | 92     | 94       | 86       | 91      | 85      | 92      | 90        | 87      | 90        | 86     | 93       |
| 2016               | Spring         | 90       | 90     | 87       | 84       | 83      | 84      | 84      | 84        | 86      | 87        | -      | 88       |
| 2016               | Summer         | 88       | 85     | 85       | 87       | 87      | 87      | 83      | 91        | 83      | 86        | 86     | 90       |
| 2016               | Autumn         | 90       | 101    | -        | 99       | 99      | 100     | 101     | 106       | 100     | 103       | 99     | 96       |
| 2016               | Winter         | 85       | 97     | 99       | 91       | 96      | 90      | 93      | 95        | 93      | 93        | 91     | 97       |
| 2017               | Spring         | 102      | 82     | 81       | 94       | 82      | 97      | 89      | -         | 92      | 87        | 87     | 82       |
| 2017               | Summer         | 68       | 93     | 89       | 87       | 88      | 85      | 87      | 91        | 85      | 84        | 94     | 93       |
| 2017               | Autumn         | 120      | 89     | 94       | 95       | 94      | 97      | 95      | 105       | 97      | 98        | 98     | 89       |
| 2017               | Winter         | 84       | 97     | 97       | 92       | 93      | 92      | 93      | 89        | 95      | 95        | 88     | 97       |
| 2018               | Spring         | 92       | 79     | 79       | 82       | 79      | 82      | 81      | 83        | 78      | 79        | 83     | 79       |
| 2018               | Summer         | -        | 101    | 100      | 93       | 103     | 94      | 100     | 93        | 96      | 98        | 91     | 100      |
| 2018               | Autumn         | 92       | 96     | 98       | 101      | 94      | 99      | 89      | 101       | 102     | 95        | 101    | 98       |
| 2018               | Winter         | -        | 84     | 83       | 80       | -       | 81      | 91      | 81        | 81      | 88        | 81     | 83       |
| 2019               | Spring         | -        | 89     | 88       | 91       | 88      | 92      | 88      | 91        | 88      | 88        | 92     | 88       |
| Numbers of sampler |                | 13       | 20     | 19       | 20       | 19      | 19      | 20      | 19        | 20      | 20        | 19     | 20       |

--:Missing sample.

**Table S2.** The ring numbers, method detection limits (MDLs), TEF<sub>i</sub>, and other information for PAHs in this study

| The target compounds (abbreviation) | Ring Numbers | MDLs (ng sample <sup>-1</sup> ) | TEF <sub>i</sub> <sup>a</sup> | Standard curve   | Correlations |
|-------------------------------------|--------------|---------------------------------|-------------------------------|------------------|--------------|
| Acenaphthylene(Acy)                 | 3            | 0.126                           | 0.001                         | y=6326.2x+16600  | 0.9930       |
| Acenaphthene (Ace)                  | 3            | 0.103                           | 0.001                         | y=4837.4x+31320  | 0.9999       |
| Fluorene (Flu)                      | 3            | 0.089                           | 0.001                         | y=24634x+44631   | 0.9998       |
| Phenanthrene (Phe)                  | 3            | 0.078                           | 0.001                         | y=97525x+43017   | 0.9913       |
| Anthracene (Ant)                    | 3            | 0.044                           | 0.01                          | y=96301x+5130.4  | 0.9958       |
| Fluoranthene (Fla)                  | 4            | 0.017                           | 0.001                         | y=210183x-79803  | 0.9977       |
| Pyrene (Pyr)                        | 4            | 0.026                           | 0.001                         | y=209836x-75917  | 0.9979       |
| Benzo[a]anthracene (BaA)            | 4            | 0.025                           | 0.1                           | y=238735x-141456 | 0.9948       |
| Chrysene (Chr)                      | 4            | 0.041                           | 0.01                          | y=159007x-74207  | 0.9928       |
| Benzo[b]fluoranthene (BbF)          | 5            | 0.062                           | 0.1                           | y=283344x-180199 | 0.9982       |
| Benzo[k]fluoranthene (BkF)          | 5            | 0.055                           | 0.1                           | y=254895x-111330 | 0.9961       |
| Benzo[a]pyrene (BaP)                | 5            | 0.016                           | 1                             | y=233835x-119274 | 0.9986       |
| Dibenzo[a,h]anthracene (DahA)       | 5            | 0.048                           | 1                             | y=126081x-124963 | 0.9962       |
| Indeno[1,2,3-cd]pyrene (InD)        | 6            | 0.032                           | 0.1                           | y=240503x-180428 | 0.9961       |
| Benzo[ghi] perylene (BghiP)         | 6            | 0.070                           | 0.01                          | y=253793x-174580 | 0.9990       |

<sup>a</sup>: The toxic equivalency factors (TEFs) (Nisbet and Lagoy, 1992).x is the concentration of PAH, loaded on the gas sample which detected; y is the peak area of target compound.



**Table S3.** The annual concentration of PAHs around Bohai Sea (Mean±SD, ng m<sup>-3</sup>)

| Compound             | Summer 2014<br>to Spring 2015 | Summer 2015<br>to Spring 2016 | Summer 2016<br>to Spring 2017 | Summer 2017<br>to Spring 2018 | Summer 2018<br>to Spring 2019 | Five-year  |
|----------------------|-------------------------------|-------------------------------|-------------------------------|-------------------------------|-------------------------------|------------|
| Acy                  | 0.63±0.26                     | 0.86±0.56                     | 0.73±0.37                     | 1.07±0.72                     | 1.14±0.86                     | 0.89±0.22  |
| Ace                  | 0.54±0.07                     | 0.84±0.28                     | 1.33±0.66                     | 1.45±1.06                     | 1.52±0.87                     | 1.13±0.42  |
| Flu                  | 4.18±3.00                     | 6.51±6.30                     | 6.60±3.98                     | 8.63±7.50                     | 9.40±6.88                     | 6.97±1.92  |
| Phe                  | 25.6±18.1                     | 26.2±16.1                     | 24.2±17.5                     | 18.1±6.64                     | 14.9±9.2                      | 21.6±5.8   |
| Ant                  | 2.44±1.95                     | 2.48±2.12                     | 2.19±1.29                     | 2.91±2.08                     | 3.43±2.11                     | 2.67±0.46  |
| Fla                  | 11.8±5.60                     | 8.08±4.88                     | 13.3±4.89                     | 10.9±6.63                     | 12.4±6.6                      | 11.24±2.05 |
| Pyr                  | 7.60±3.47                     | 1.47±0.73                     | 8.49±2.97                     | 6.37±3.82                     | 7.47±3.83                     | 6.26±2.8   |
| BaA                  | 1.16±0.55                     | 1.29±0.30                     | 0.75±0.38                     | 0.66±0.55                     | 0.78±0.60                     | 0.92±0.29  |
| Chr                  | 1.65±0.44                     | 1.37±0.27                     | 1.39±0.49                     | 1.12±0.64                     | 1.20±0.62                     | 1.35±0.22  |
| BbF                  | 1.83±0.44                     | 1.46±0.20                     | 0.46±0.27                     | 0.26±0.26                     | 0.47±0.33                     | 0.89±0.71  |
| BkF                  | 1.15±0.20                     | 0.78±0.09                     | 0.29±0.11                     | 0.29±0.25                     | 0.55±0.35                     | 0.61±0.36  |
| BaP                  | 0.86±0.17                     | 1.14±0.43                     | 0.34±0.28                     | 0.32±0.16                     | 0.18±0.18                     | 0.57±0.42  |
| DahA                 | 1.03±0.42                     | 0.74±0.42                     | 0.07±0.04                     | 0.06±0.05                     | 0.04±0.02                     | 0.39±0.47  |
| InD                  | 1.22±0.57                     | 1.74±0.75                     | 0.32±0.18                     | 0.24±0.26                     | 0.21±0.14                     | 0.74±0.69  |
| BghiP                | 1.07±0.67                     | 1.10±0.20                     | 0.27±0.17                     | 0.20±0.20                     | 0.26±0.18                     | 0.58±0.46  |
| ∑ <sub>15</sub> PAHs | 63.6±58.4                     | 55.5±37.9                     | 60.9±31.1                     | 51.4±29.4                     | 52.5±40.1                     | 56.8±4.80  |
| LMW-PAHs             | 34.0±18.8                     | 36.4±29.8                     | 35.1±22.4                     | 31.6±24.1                     | 29.0±28.5                     | 33.2±6.81  |
| MMW-PAHs             | 22.5±18.5                     | 12.1±9.82                     | 24.0±19.9                     | 18.6±11.6                     | 21.6±11.4                     | 19.8±4.70  |
| HMW-PAHs             | 7.18±3.32                     | 6.93±3.28                     | 1.76±1.80                     | 1.19±2.12                     | 1.81±2.15                     | 3.78±2.69  |

**Table S4.** Significance level between annual mean concentration of PAHs by t-test

|                    | year 1-<br>year 2 | year 2-<br>year 3 | year 3-<br>year 4 | year 4-<br>year 5 |
|--------------------|-------------------|-------------------|-------------------|-------------------|
| $\Sigma_{15}$ PAHs | 0.541             | 0.477             | 0.139             | 0.142             |
| 3-ring             | 0.809             | 0.768             | 0.168             | 0.067             |
| 4-ring             | <b>0.002</b>      | <b>0.001</b>      | 0.152             | 0.575             |
| 5-ring             | 0.055             | <b>0.000</b>      | 0.108             | 0.056             |
| 6-ring             | 0.133             | <b>0.000</b>      | 0.219             | 0.813             |

Note: Bold:  $p < 0.05$ , the difference is significant.

**Table S5.** The seasonal concentration of PAHs (Mean $\pm$ SD, ng m<sup>-3</sup>)

| Compound           | Spring           | Summer          | Autumn          | Winter           |
|--------------------|------------------|-----------------|-----------------|------------------|
| Acy                | 0.48 $\pm$ 0.19  | 0.42 $\pm$ 0.2  | 1.75 $\pm$ 0.56 | 0.89 $\pm$ 0.4   |
| Ace                | 0.72 $\pm$ 0.25  | 0.88 $\pm$ 0.84 | 1.31 $\pm$ 0.60 | 1.63 $\pm$ 1.15  |
| Flu                | 2.95 $\pm$ 1.71  | 1.95 $\pm$ 1.06 | 7.60 $\pm$ 2.23 | 15.8 $\pm$ 5.19  |
| Phe                | 18.8 $\pm$ 12.01 | 9.26 $\pm$ 4.61 | 17.2 $\pm$ 5.83 | 41.4 $\pm$ 14.3  |
| Ant                | 1.28 $\pm$ 0.76  | 0.65 $\pm$ 0.14 | 3.41 $\pm$ 0.64 | 5.43 $\pm$ 0.95  |
| Fla                | 9.08 $\pm$ 5.54  | 5.84 $\pm$ 4.52 | 11.0 $\pm$ 1.57 | 19.2 $\pm$ 2.68  |
| Pyr                | 4.94 $\pm$ 3.37  | 3.77 $\pm$ 3.75 | 6.14 $\pm$ 2.64 | 10.3 $\pm$ 4.38  |
| BaA                | 0.61 $\pm$ 0.34  | 0.50 $\pm$ 0.37 | 0.91 $\pm$ 0.31 | 1.69 $\pm$ 0.24  |
| Chr                | 1.27 $\pm$ 0.38  | 0.84 $\pm$ 0.42 | 1.23 $\pm$ 0.31 | 2.05 $\pm$ 0.27  |
| BbF                | 0.81 $\pm$ 0.74  | 0.61 $\pm$ 0.63 | 0.80 $\pm$ 0.75 | 1.37 $\pm$ 0.74  |
| BkF                | 0.64 $\pm$ 0.44  | 0.42 $\pm$ 0.38 | 0.51 $\pm$ 0.39 | 0.88 $\pm$ 0.37  |
| BaP                | 0.42 $\pm$ 0.30  | 0.31 $\pm$ 0.33 | 0.63 $\pm$ 0.58 | 0.91 $\pm$ 0.48  |
| DahA               | 0.40 $\pm$ 0.53  | 0.13 $\pm$ 0.16 | 0.38 $\pm$ 0.47 | 0.64 $\pm$ 0.73  |
| InD                | 0.74 $\pm$ 0.83  | 0.38 $\pm$ 0.35 | 0.62 $\pm$ 0.79 | 1.24 $\pm$ 1.00  |
| BghiP              | 0.72 $\pm$ 0.82  | 0.32 $\pm$ 0.34 | 0.40 $\pm$ 0.42 | 0.88 $\pm$ 0.47  |
| $\Sigma_{15}$ PAHs | 43.9 $\pm$ 19.5  | 26.3 $\pm$ 13.4 | 53.9 $\pm$ 9.10 | 104.3 $\pm$ 9.50 |
| LMW-PAHs           | 24.3 $\pm$ 14.7  | 13.2 $\pm$ 6.62 | 31.3 $\pm$ 8.03 | 65.2 $\pm$ 12.1  |
| MMW-PAHs           | 15.9 $\pm$ 8.93  | 11.0 $\pm$ 8.48 | 19.3 $\pm$ 3.93 | 33.3 $\pm$ 7.10  |
| HMW-PAHs           | 3.73 $\pm$ 3.53  | 2.17 $\pm$ 2.14 | 3.34 $\pm$ 3.10 | 5.93 $\pm$ 3.51  |

**Table S6.** Significant difference between seasonal PAHs concentration and ring number by t-test

| Compound           | Spring-Summer | Summer-Autumn | Autumn-Winter | Winter-Spring |
|--------------------|---------------|---------------|---------------|---------------|
| $\Sigma_{15}$ PAHs | <b>0.000</b>  | <b>0.000</b>  | <b>0.000</b>  | <b>0.000</b>  |
| 3-ring             | <b>0.000</b>  | <b>0.000</b>  | <b>0.000</b>  | <b>0.000</b>  |
| 4-ring             | <b>0.035</b>  | <b>0.003</b>  | <b>0.000</b>  | <b>0.000</b>  |
| 5-ring             | <b>0.005</b>  | <b>0.007</b>  | <b>0.001</b>  | <b>0.001</b>  |
| 6-ring             | <b>0.001</b>  | 0.123         | <b>0.000</b>  | <b>0.045</b>  |

**Table S7.** The annual average daily concentration of 15 PAHs at 12 sampling sites from June 2014 to May 2019 (Mean±SD, ng m<sup>-3</sup>)

| Compounds            | BH        | DL        | DG         | DY        | GZ        | LK        | LT        | RC        | TJ        | XC         | YT        | ZH        |
|----------------------|-----------|-----------|------------|-----------|-----------|-----------|-----------|-----------|-----------|------------|-----------|-----------|
| Acy                  | 0.61±0.20 | 0.61±0.20 | 0.83±0.37  | 0.47±0.08 | 1.39±0.52 | 0.35±0.24 | 1.28±0.47 | 0.46±0.07 | 0.76±0.20 | 2.22±0.78  | 0.46±0.08 | 1.18±0.58 |
| Ace                  | 0.82±0.24 | 0.82±0.24 | 1.45±0.79  | 0.65±0.18 | 1.60±0.65 | 0.69±0.45 | 1.34±0.52 | 0.86±0.25 | 1.42±0.66 | 1.64±0.59  | 0.75±0.24 | 1.28±0.57 |
| Flu                  | 3.95±0.61 | 3.95±0.61 | 8.10±3.57  | 4.05±0.80 | 9.80±2.32 | 4.81±1.22 | 10.1±3.15 | 3.25±1.03 | 5.85±1.20 | 15.5±5.59  | 3.73±1.44 | 9.31±4.42 |
| Phe                  | 14.3±2.36 | 14.3±2.36 | 27.05±8.31 | 11.4±2.28 | 45.2±15.9 | 14.8±4.18 | 40.6±10.4 | 9.96±4.05 | 23.3±6.57 | 32.7±27.4  | 13.8±3.85 | 37.9±12.8 |
| Ant                  | 1.07±0.30 | 1.07±0.30 | 2.83±1.44  | 0.73±0.23 | 5.72±1.99 | 1.05±0.35 | 3.69±0.95 | 0.90±0.34 | 1.24±0.22 | 8.30±3.84  | 0.91±0.28 | 3.98±1.76 |
| Fla                  | 5.30±1.43 | 5.30±1.43 | 12.5±3.55  | 5.65±1.17 | 22.3±6.69 | 7.11±2.72 | 16.8±4.13 | 4.67±1.70 | 11.1±4.47 | 20.9±4.31  | 7.23±1.78 | 13.6±4.56 |
| Pyr                  | 2.78±1.38 | 2.78±1.38 | 6.91±3.17  | 2.28±0.86 | 13.5±6.45 | 3.77±2.22 | 9.43±4.09 | 2.40±1.07 | 5.64±3.81 | 12.1±5.26  | 3.33±1.00 | 8.80±4.14 |
| BaA                  | 0.54±0.40 | 0.54±0.40 | 0.97±0.32  | 0.52±0.34 | 1.59±0.48 | 0.46±0.10 | 1.15±0.27 | 0.47±0.31 | 0.79±0.46 | 2.09±0.60  | 0.58±0.37 | 1.19±0.27 |
| Chr                  | 0.84±0.44 | 0.84±0.44 | 1.25±0.47  | 0.99±0.22 | 2.30±0.60 | 0.95±0.38 | 1.68±0.23 | 0.83±0.25 | 1.43±0.72 | 2.21±0.44  | 1.05±0.29 | 1.45±0.32 |
| BbF                  | 0.70±0.69 | 0.70±0.69 | 0.86±0.54  | 0.73±0.63 | 1.25±0.63 | 0.68±0.48 | 0.98±0.67 | 0.65±0.60 | 0.86±0.72 | 1.33±0.79  | 0.74±0.65 | 1.07±0.79 |
| BkF                  | 0.46±0.42 | 0.46±0.42 | 0.65±0.29  | 0.50±0.36 | 0.83±0.24 | 0.44±0.25 | 0.69±0.33 | 0.43±0.35 | 0.57±0.38 | 0.99±0.50  | 0.52±0.35 | 0.70±0.47 |
| BaP                  | 0.32±0.27 | 0.32±0.27 | 0.45±0.21  | 0.34±0.26 | 0.90±0.53 | 0.44±0.37 | 0.88±0.60 | 0.21±0.30 | 0.72±0.62 | 0.91±0.49  | 0.59±0.57 | 0.61±0.40 |
| DahA                 | 0.17±0.19 | 0.17±0.19 | 0.34±0.35  | 0.25±0.28 | 0.54±0.54 | 0.54±0.69 | 0.56±0.64 | 0.17±0.15 | 0.57±0.69 | 0.62±0.64  | 0.36±0.49 | 0.28±0.34 |
| InD                  | 0.59±0.60 | 0.59±0.60 | 0.72±0.49  | 0.55±0.52 | 1.04±0.77 | 0.38±0.25 | 1.04±0.91 | 0.36±0.36 | 0.91±0.89 | 1.35±1.21  | 0.69±0.72 | 0.69±0.53 |
| BghiP                | 0.42±0.42 | 0.42±0.42 | 0.48±0.29  | 0.58±0.56 | 0.76±0.43 | 0.52±0.41 | 0.66±0.43 | 0.31±0.27 | 0.66±0.58 | 0.89±0.51  | 0.57±0.54 | 0.54±0.37 |
| ∑ <sub>15</sub> PAHs | 27.5±10.9 | 32.9±7.03 | 65.4±9.68  | 29.7±3.68 | 98.8±27.8 | 37.0±9.60 | 90.8±17.1 | 25.9±6.41 | 55.8±16.9 | 103.7±39.1 | 35.3±7.58 | 72.5±25.4 |
| LMW-PAHs             | 16.9±6.94 | 20.8±2.54 | 40.3±7.47  | 17.3±3.32 | 53.7±16.0 | 21.7±5.97 | 57.0±11.7 | 15.4±5.25 | 32.5±7.17 | 60.3±34.7  | 19.6±5.44 | 43.6±18.9 |
| MMW-PAHs             | 8.81±5.10 | 9.46±3.14 | 21.6±6.91  | 9.44±1.83 | 39.7±13.9 | 12.3±5.24 | 29.0±7.90 | 8.37±2.66 | 18.9±8.83 | 37.3±9.57  | 12.2±2.28 | 25.0±8.89 |
| HMW-PAHs             | 1.89±1.45 | 2.68±2.52 | 3.52±2.05  | 3.00±2.51 | 5.43±2.89 | 3.06±2.32 | 4.90±3.35 | 2.18±1.72 | 4.35±3.72 | 6.27±3.65  | 3.52±3.03 | 3.97±2.68 |

**Table S8.** Pearson correlation coefficients of the proportion of different ring number of PAHs among 12 sampling sites from June 2014 to May 2019

|    | BH    | DL    | DG    | DY    | GZ    | LT    | LK    | RC    | TJ    | XC    | YT    | ZH |
|----|-------|-------|-------|-------|-------|-------|-------|-------|-------|-------|-------|----|
| BH | 1     |       |       |       |       |       |       |       |       |       |       |    |
| DL | .99** | 1     |       |       |       |       |       |       |       |       |       |    |
| DG | .99** | .99** | 1     |       |       |       |       |       |       |       |       |    |
| DY | .99** | .99** | .99** | 1     |       |       |       |       |       |       |       |    |
| GZ | .98** | .98** | .99** | .98** | 1     |       |       |       |       |       |       |    |
| LT | .98** | .99** | .99** | .99** | .99** | 1     |       |       |       |       |       |    |
| LK | .99** | .99** | .99** | .99** | .99** | .99** | 1     |       |       |       |       |    |
| RC | .99** | .99** | .99** | .99** | .99** | .99** | .99** | 1     |       |       |       |    |
| TJ | .98** | .99** | .99** | .99** | .99** | .99** | .99** | .99** | 1     |       |       |    |
| XC | .97** | .99** | .99** | .98** | .98** | .99** | .98** | .98** | .98** | 1     |       |    |
| YT | .98** | .98** | .99** | .99** | .99** | .99** | .99** | .99** | .99** | .98** | 1     |    |
| ZH | .97** | .99** | .99** | .98** | .99** | .99** | .99** | .99** | .99** | .99** | .98** | 1  |

Note: \*\*. at the 0.05 level (two-tailed), the correlation is significant, \* at the 0.01 level (two-tailed), the correlation is significant.

**Table S9.** Pearson correlation coefficient of 20 seasonal concentrations of PAHs at Tianjin and the four adjacent sites

|    | TJ     | LT     | DY     | LK     | XC |
|----|--------|--------|--------|--------|----|
| TJ | 1      |        |        |        |    |
| LT | 0.50*  | 1      |        |        |    |
| DY | 0.61*  | 0.89** | 1      |        |    |
| LK | 0.66** | 0.73** | 0.75** | 1      |    |
| XC | 0.68** | 0.79** | 0.72** | 0.77** | 1  |

Note: \*\*. at the 0.01 level (two-tailed), the correlation is significant.

**Table S10.** VARIMAX-rotated factor loadings of PCA of atmospheric PAHs at the BS

| PAHs                       | PC1          | PC2          | PC3          | PC4          |
|----------------------------|--------------|--------------|--------------|--------------|
| Ace                        | -0.057       | <b>0.631</b> | 0.003        | <b>0.678</b> |
| Acy                        | 0.050        | 0.154        | 0.266        | <b>0.830</b> |
| Flu                        | 0.157        | 0.510        | 0.553        | 0.498        |
| Ant                        | 0.228        | 0.394        | <b>0.690</b> | 0.470        |
| Phe                        | 0.255        | 0.325        | <b>0.867</b> | 0.123        |
| BaA                        | 0.548        | 0.560        | 0.462        | 0.303        |
| Chr                        | 0.517        | <b>0.694</b> | 0.324        | 0.214        |
| Fla                        | 0.217        | <b>0.819</b> | 0.400        | 0.241        |
| Pyr                        | 0.047        | <b>0.930</b> | 0.219        | 0.141        |
| BaP                        | <b>0.826</b> | 0.048        | 0.343        | 0.110        |
| BkF                        | <b>0.827</b> | 0.474        | 0.095        | 0.094        |
| DahA                       | <b>0.859</b> | -0.009       | 0.033        | -0.110       |
| InD                        | <b>0.886</b> | -0.042       | 0.302        | 0.202        |
| BbF                        | <b>0.909</b> | 0.297        | 0.200        | 0.005        |
| BghiP                      | <b>0.932</b> | 0.168        | -0.006       | 0.038        |
| Explained variance (%)     | 35.657       | 24.130       | 15.925       | 12.828       |
| Sum explained variance (%) | 35.657       | 59.787       | 75.712       | 88.540       |

Note: The bold value indicates that the PCA load is greater than 0.6.

**Table S11.** Characteristic PAH molecular diagnostic ratios

|                 | Petrogenic | Petroleum combustion | Grass, wood, coal combustion | Reference                                      |
|-----------------|------------|----------------------|------------------------------|------------------------------------------------|
| Fla/(Fla+Pyr)   | <0.4       | 0.4–0.5              | >0.5                         | (Westerholm et al., 2001; Yunker et al., 2002; |
| InD/(InD+Bghip) | <0.2       | 0.2–0.5              | >0.5                         | Tobiszewski and Namiesnik, 2012)               |

**Table S12.** The seasonal mean concentration of PM<sub>2.5</sub> (μg m<sup>-3</sup>) and PAHs (ng m<sup>-3</sup>)

| sites       | DG                |      | DL                |      | DY                |      | GZ                |      | LT                |      | TJ                |      | XC                |      | YT                |      |
|-------------|-------------------|------|-------------------|------|-------------------|------|-------------------|------|-------------------|------|-------------------|------|-------------------|------|-------------------|------|
|             | PM <sub>2.5</sub> | PAHs |
| 2014 summer | 35                | 25   | 43                | 8    | 60                | 16   | 30                | 45   | 77                | 35   | 64                | 55   | 48                | 49   | 44                | 16   |
| 2014 autumn | 44                | 56   | 49                | 29   | 73                | 26   | 37                | 172  | 96                | 82   | 89                | 74   | 45                | 123  | 42                | 31   |
| 2014 winter | 61                | 117  | 54                | 70   | 87                | 70   | 53                | 288  | 102               | 178  | 96                | 103  | 65                | 191  | 55                | 74   |
| 2015 spring | 47                | 43   | 44                | 20   | 73                | 17   | 47                | 78   | 90                | 53   | 62                | 42   | 55                | 52   | 47                | 21   |
| 2015 summer | 29                | 18   | 31                | 12   | 59                | 10   | 28                | 31   | 63                | 31   | 53                | 33   | 45                | 25   | 32                | 19   |
| 2015 autumn | 47                | 69   | 50                | 26   | 76                | 25   | 54                | 79   | 71                | 97   | 62                | 88   | 42                | 215  | 36                | 43   |
| 2015 winter | 56                | 88   | 58                | 84   | 104               | 45   | 63                | 126  | 91                | 153  | 83                | 117  | 60                | 396  | 59                | 66   |
| 2016 spring | 50                | 22   | 44                | 14   | 64                | 21   | 42                | 41   | 65                | 30   | 65                | 73   | 46                | 35   | 44                | --   |
| 2016 summer | 28                | 85   | 24                | 28   | 41                | 11   | 28                | 89   | 51                | 36   | 49                | 20   | 36                | 119  | 25                | 18   |
| 2016 autumn | 38                | --   | 36                | 24   | 65                | 30   | 49                | 167  | 82                | 65   | 73                | 46   | 46                | 91   | 36                | 34   |
| 2016 winter | 54                | 114  | 54                | 49   | 96                | 76   | 74                | 212  | 121               | 175  | 110               | 108  | 78                | 281  | 54                | 42   |
| 2017 spring | 42                | 13   | 38                | 32   | 54                | 19   | 38                | 59   | 60                | 69   | 58                | 41   | 43                | 53   | 37                | 18   |
| 2017 summer | 20                | 19   | 24                | 11   | 38                | 11   | 28                | 27   | 44                | 31   | 45                | 20   | 37                | 34   | 25                | 15   |
| 2017 autumn | 29                | 48   | 27                | 20   | 50                | 25   | 36                | 82   | 62                | 82   | 56                | 36   | 38                | 100  | 27                | 29   |
| 2017 winter | 44                | 194  | 38                | 71   | 67                | 45   | 62                | 119  | 67                | 142  | 61                | 65   | 58                | 148  | 41                | 46   |
| 2018 spring | 31                | 44   | 31                | 18   | 47                | 19   | 41                | 126  | 59                | 59   | 52                | 30   | 41                | 27   | 29                | 12   |
| 2018 summer | 16                | 14   | 19                | 8    | 27                | 8    | 20                | 33   | 41                | 21   | 36                | 14   | 25                | 10   | 19                | 11   |
| 2018 autumn | 26                | 36   | 28                | 11   | 45                | 28   | 39                | 172  | 58                | 115  | 51                | 35   | 40                | 280  | 24                | 22   |
| 2018 winter | 50                | 141  | 45                | 42   | 73                | 56   | 61                | --   | 73                | 186  | 71                | 62   | 62                | 325  | 57                | 71   |
| 2019 Spring | 38                | 91   | 40                | 31   | 45                | 33   | 41                | 122  | 51                | 174  | 48                | 21   | 45                | 116  | 35                | 74   |

The data of PM<sub>2.5</sub> from <https://www.aqistudy.cn/historydata/>;--: Missing sample



**Table S13.** The Pearson correlation of concentration between PM<sub>2.5</sub> and PAHs

| sites               | DG    | DL     | DY     | GZ     | LT    | TJ     | XC     | YT     |
|---------------------|-------|--------|--------|--------|-------|--------|--------|--------|
| Pearson correlation | .537* | .637** | .724** | .600** | .485* | .868** | .705** | .682** |
| Sig. (two- tailed)  | 0.018 | 0.003  | 0.000  | 0.007  | 0.030 | 0.000  | 0.001  | 0.001  |
| Number of cases     | 19    | 20     | 20     | 19     | 20    | 20     | 20     | 19     |

\*\* . At the 0.01 level (two-tailed), the correlation is significant.

**Table S14.** The annual mean of ILCR caused by PAHs exposure around the BS and TJ from June 2014 to May 2019

| Area | 2014-2015             | 2015-2016             | 2016-2017             | 2017-2018             | 2018-2019             | Average               |
|------|-----------------------|-----------------------|-----------------------|-----------------------|-----------------------|-----------------------|
| BS   | $2.22 \times 10^{-4}$ | $2.16 \times 10^{-4}$ | $5.86 \times 10^{-4}$ | $4.07 \times 10^{-5}$ | $5.70 \times 10^{-5}$ | $1.19 \times 10^{-4}$ |
| TJ   | $3.16 \times 10^{-4}$ | $2.94 \times 10^{-4}$ | $7.33 \times 10^{-5}$ | $2.39 \times 10^{-5}$ | $2.72 \times 10^{-5}$ | $1.47 \times 10^{-4}$ |

**Table S15.** Annual average TEQ of atmospheric PAHs around the BS from June 2014 to May 2019

| Year      | TEQ       | BaP       | DahA      | TEQ-BaP%  | TEQ-DahA% |
|-----------|-----------|-----------|-----------|-----------|-----------|
| 2014–2015 | 2.55±1.49 | 0.87±0.56 | 1.04±0.87 | 31.5±23.6 | 29.5±24.0 |
| 2015–2016 | 2.49±1.63 | 1.14±0.84 | 0.73±0.73 | 36.0±27.7 | 20.8±22.2 |
| 2016–2017 | 0.69±0.76 | 0.34±0.44 | 0.07±0.07 | 42.7±16.1 | 11.8±7.1  |
| 2017–2018 | 0.46±0.66 | 0.17±0.27 | 0.06±0.1  | 37.5±11.2 | 12.7±8.0  |
| 2018–2019 | 0.67±0.84 | 0.32±0.43 | 0.04±0.06 | 43.3±15.6 | 8.3±11.6  |
| Average   | 1.37±1.05 | 0.57±0.41 | 0.39±0.47 | 38.2±8.0  | 16.6±9.0  |

Note: TEQ-BaP% and TEQ-DahA% represent the proportion of BaP and DahA in TEQ, respectively.

**Table S16.** The direct medical costs of lung cancer caused by PAHs exposure around the BS

| Year    | rr     | URR  | PAF   | I <sub>add</sub>      | Population (persons) | C <sub>t</sub> (USD) |
|---------|--------|------|-------|-----------------------|----------------------|----------------------|
| 2014    | 1.0027 | 4.49 | 2.68‰ | 2.34×10 <sup>-6</sup> | 2.29×10 <sup>8</sup> | 4.35×10 <sup>6</sup> |
| 2015    | 1.0026 | 4.49 | 2.61‰ | 2.28×10 <sup>-6</sup> | 2.30×10 <sup>8</sup> | 4.27×10 <sup>6</sup> |
| 2016    | 1.0007 | 4.49 | 0.73‰ | 6.36×10 <sup>-7</sup> | 2.32×10 <sup>8</sup> | 1.20×10 <sup>6</sup> |
| 2017    | 1.0005 | 4.49 | 0.49‰ | 4.25×10 <sup>-7</sup> | 2.33×10 <sup>8</sup> | 8.03×10 <sup>5</sup> |
| 2018    | 1.0007 | 4.49 | 0.70‰ | 6.15×10 <sup>-7</sup> | 2.34×10 <sup>8</sup> | 1.17×10 <sup>5</sup> |
| Average | 1.0014 | 4.49 | 1.44‰ | 1.26×10 <sup>-6</sup> | 2.32×10 <sup>8</sup> | 3.36×10 <sup>6</sup> |

Note: The population data derives from: <http://tjj.ln.gov.cn/tjsj/sjcx/ndsj/>,  
<http://tjj.hebei.gov.cn/hetj/tjsj/jjnj/>,  
<http://tjj.shandong.gov.cn/col/col104011/index.html?jh=263>.

**Table S17.** The direct medical costs of lung cancer caused by PAHs exposure at TJ

| Year    | rr     | URR  | PAF   | I <sub>add</sub>      | Population (persons) | C <sub>t</sub> (USD) |
|---------|--------|------|-------|-----------------------|----------------------|----------------------|
| Year 1  | 1.0038 | 4.49 | 3.81‰ | 3.33×10 <sup>-6</sup> | 1.52×10 <sup>7</sup> | 4.39×10 <sup>5</sup> |
| Year 2  | 1.0036 | 4.49 | 3.54‰ | 3.10×10 <sup>-6</sup> | 1.55×10 <sup>7</sup> | 4.17×10 <sup>5</sup> |
| Year 3  | 1.0009 | 4.49 | 0.89‰ | 7.73×10 <sup>-7</sup> | 1.56×10 <sup>7</sup> | 1.05×10 <sup>5</sup> |
| Year 4  | 1.0003 | 4.49 | 0.29‰ | 2.53×10 <sup>-7</sup> | 1.56×10 <sup>7</sup> | 3.42×10 <sup>4</sup> |
| Year 5  | 1.0003 | 4.49 | 0.33‰ | 2.87×10 <sup>-7</sup> | 1.56×10 <sup>7</sup> | 3.90×10 <sup>4</sup> |
| Average | 1.0018 | 4.49 | 1.77‰ | 1.55×10 <sup>-6</sup> | 1.55×10 <sup>7</sup> | 2.07×10 <sup>5</sup> |

Note: The population data derives from: [http://stats.tj.gov.cn/tjsj\\_52032/tjnj/](http://stats.tj.gov.cn/tjsj_52032/tjnj/).

## Figures

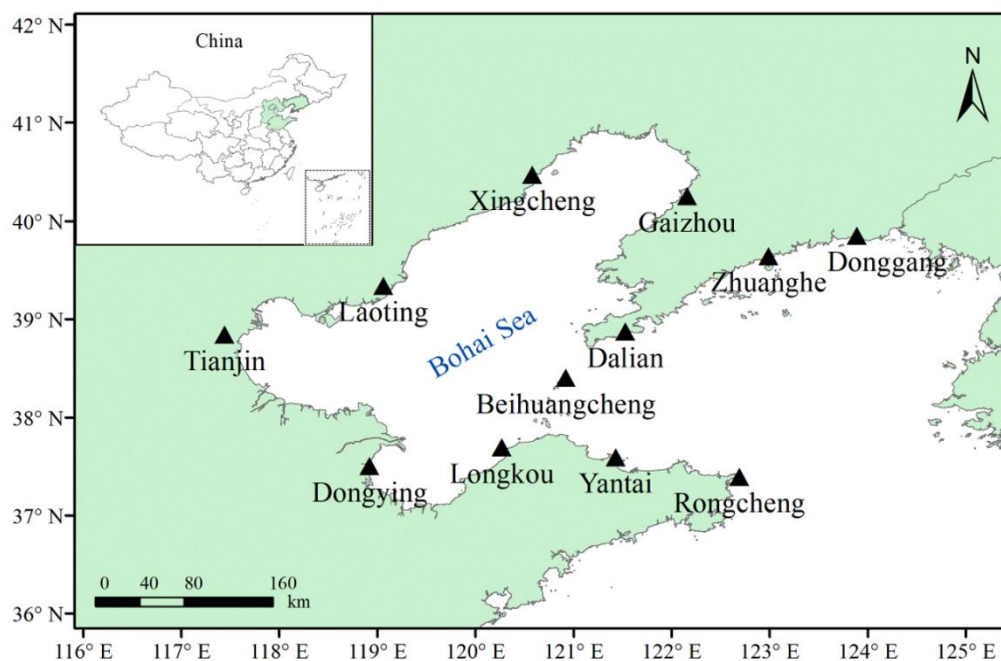

**Figure S1.** The locations of the 12 sampling sites around the BS.

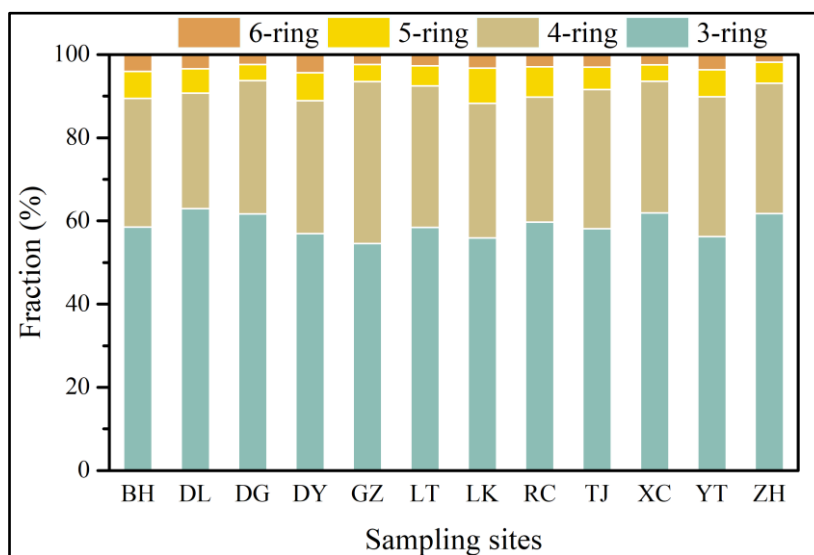

**Figure S2.** The five-year average fractions of different rings of  $\Sigma_{15}$  PAHs at 12 sampling sites.

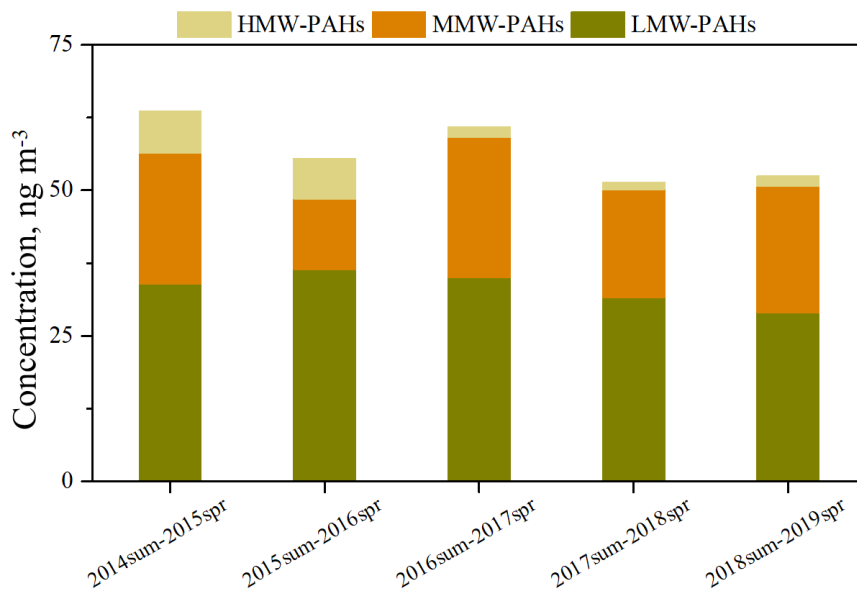

**Figure S3.** The annual average concentration of PAHs sub-rings around the BS.

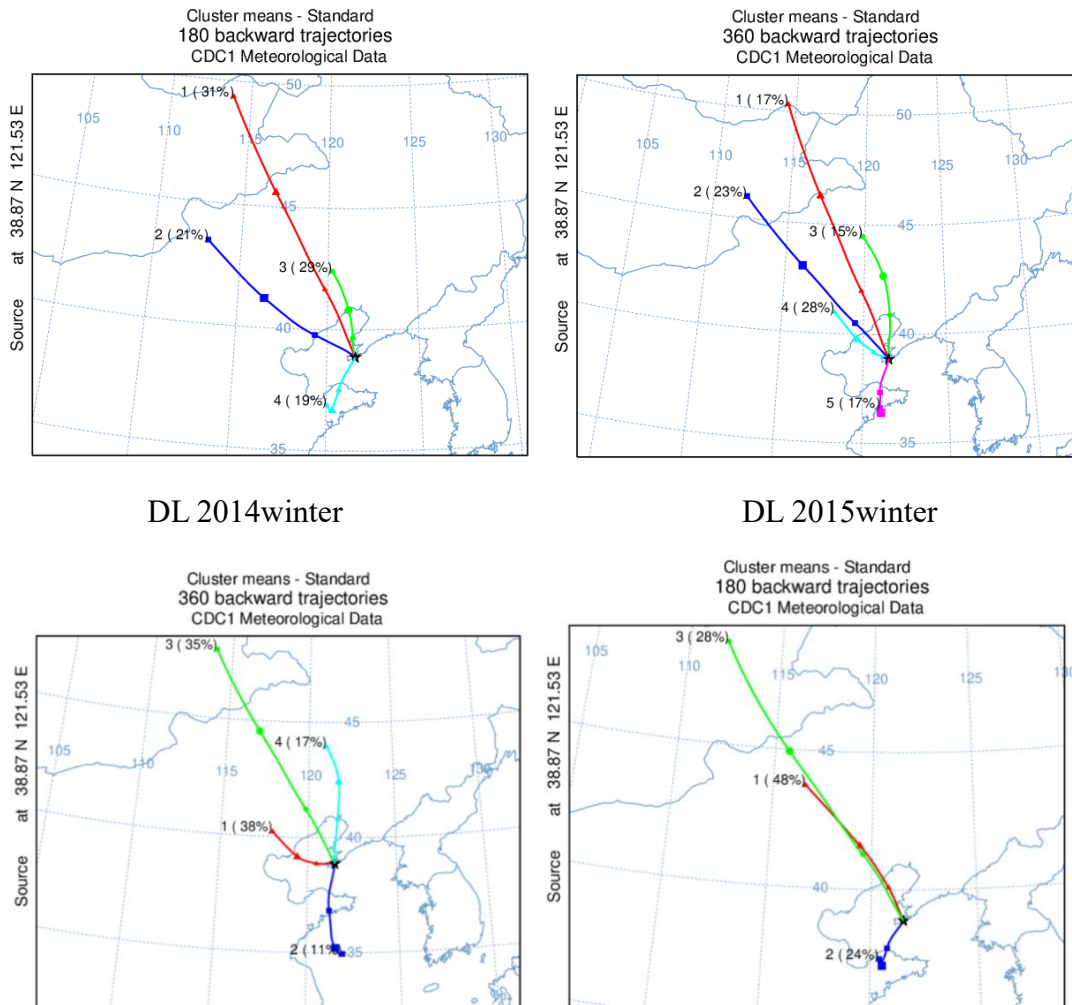

DL 2016winter

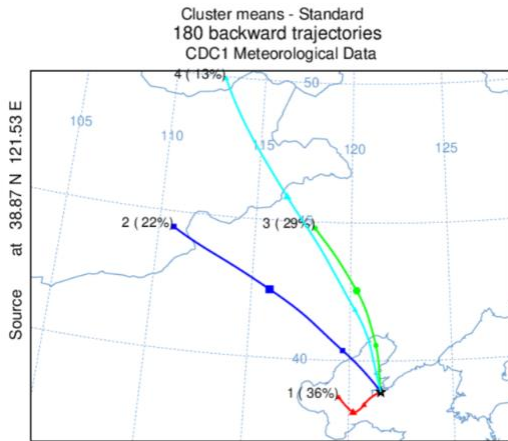

DL 2017winter

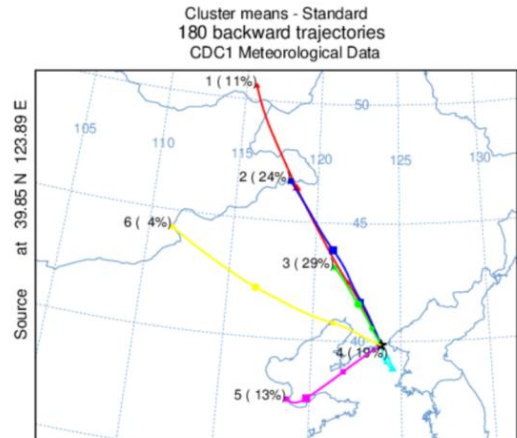

DL 2018winter

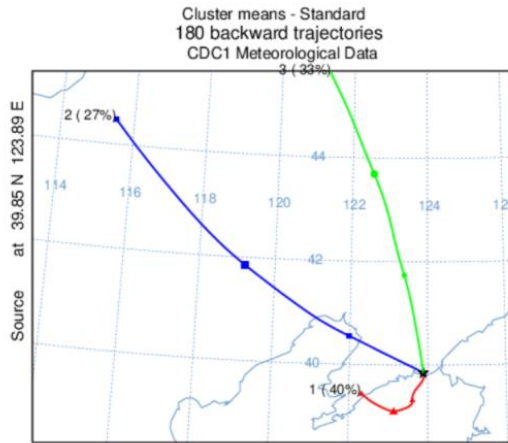

DG 2014winter

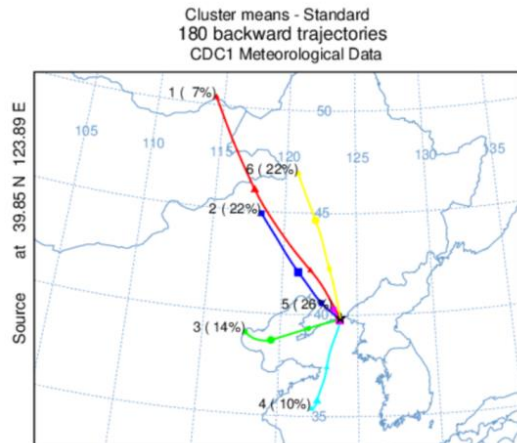

DG 2015winter

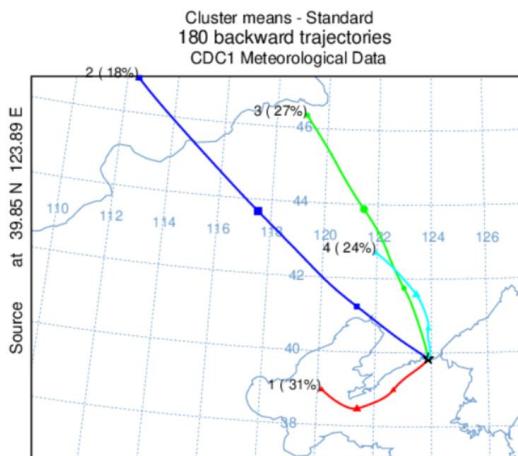

DG 2016winter

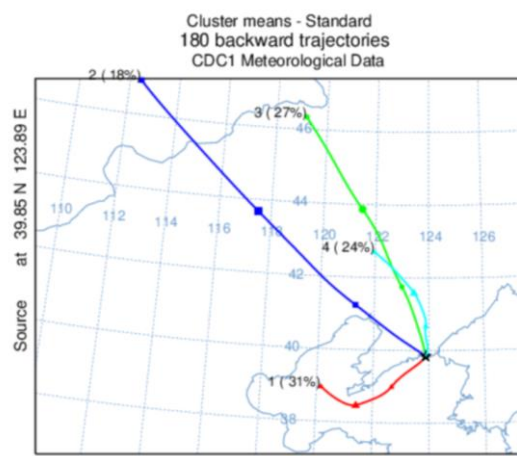

DG 2017winter

DG 2017winter

DG 2018winter

DG 2018winter

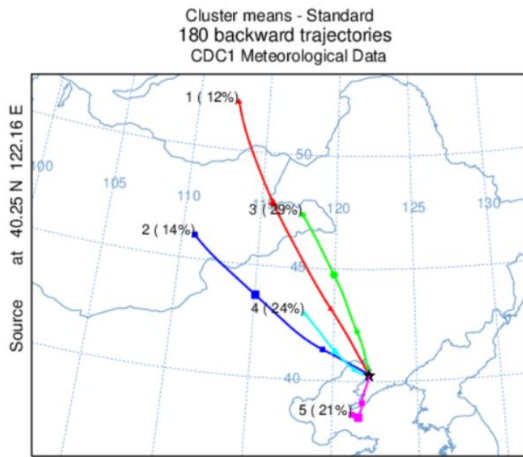

GZ 2014winter

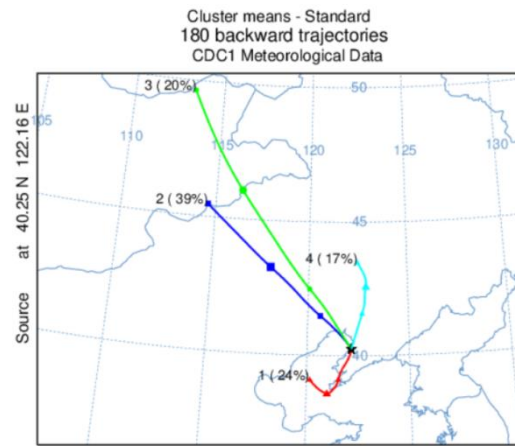

GZ 2015winter

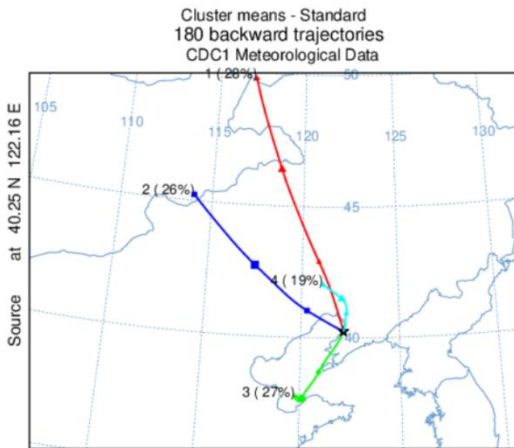

GZ 2016winter

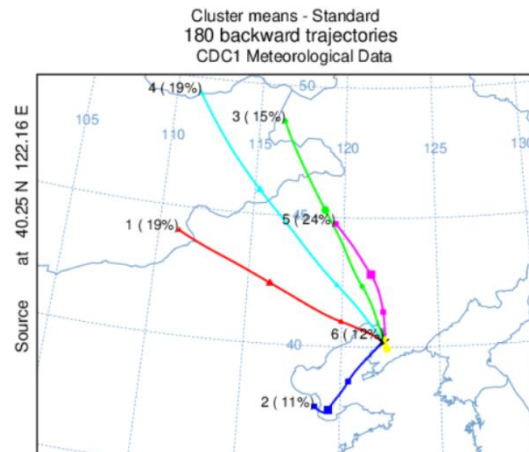

GZ 2017winter

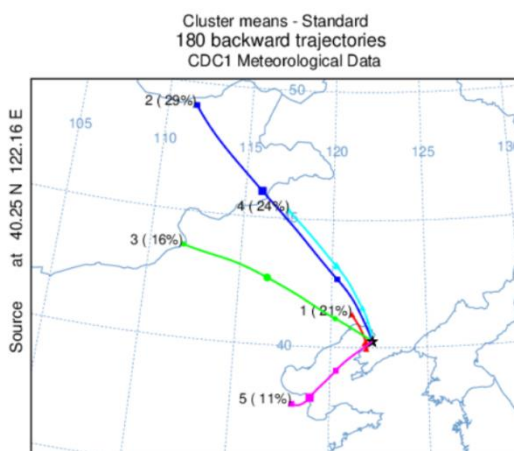

GZ 2018winter

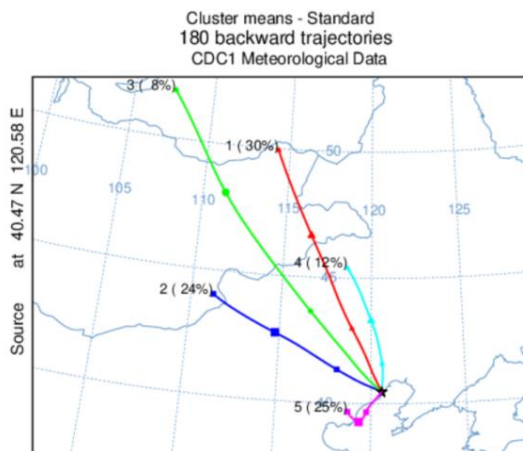

XC 2014winter



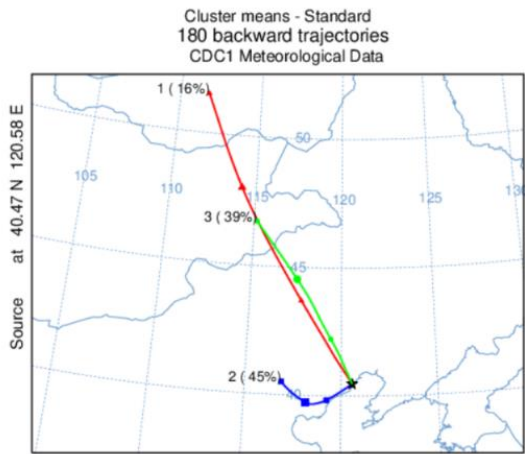

XC 2015winter

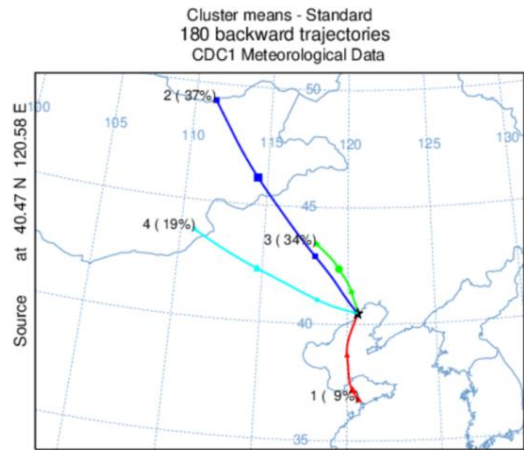

XC 2016winter

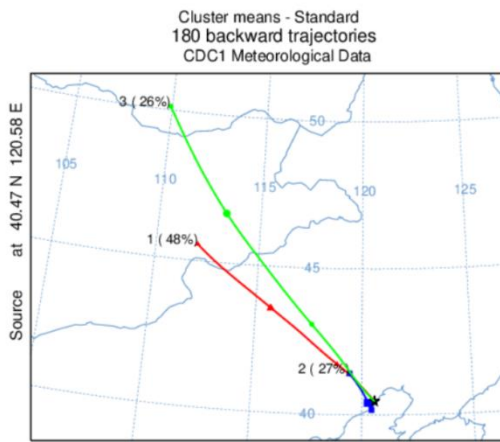

XC 2017winter

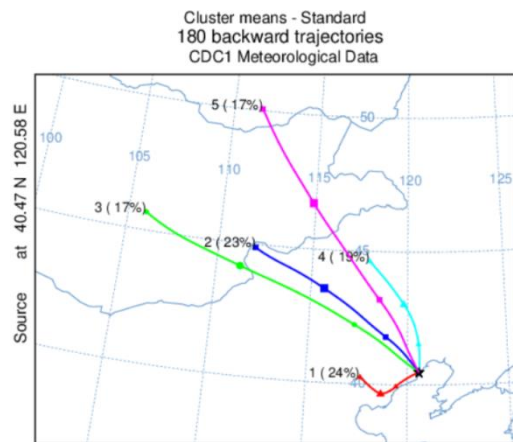

XC 2018winter

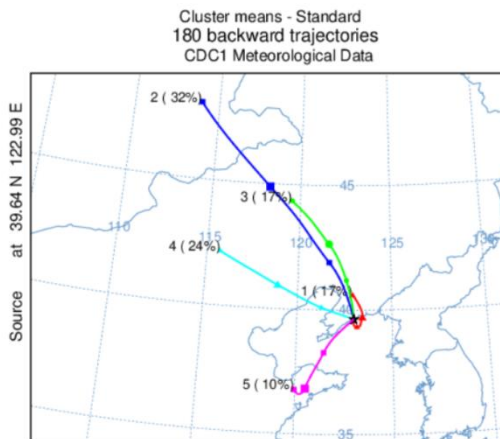

ZH 2014winter

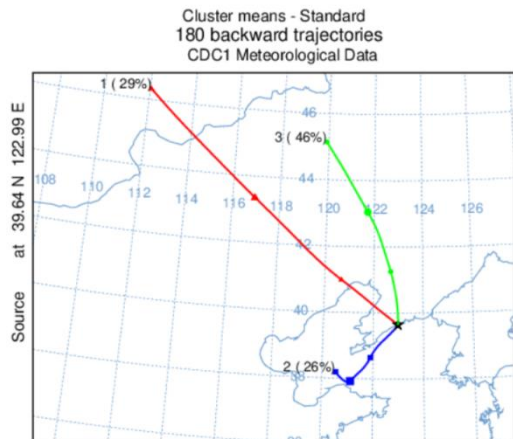

ZH 2015winter

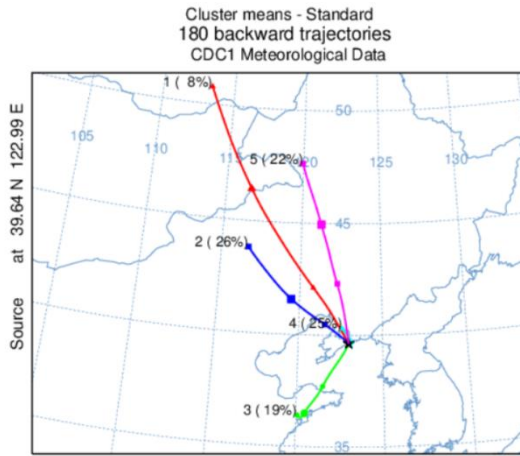

ZH 2016winter

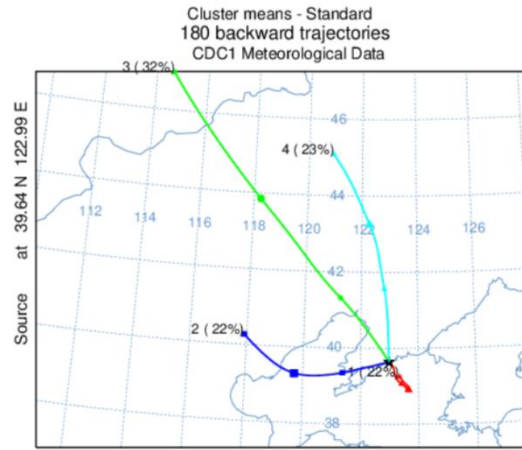

ZH 2017winter

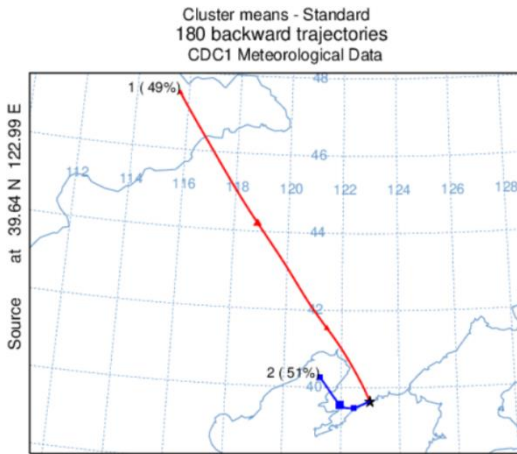

ZH 2018winter

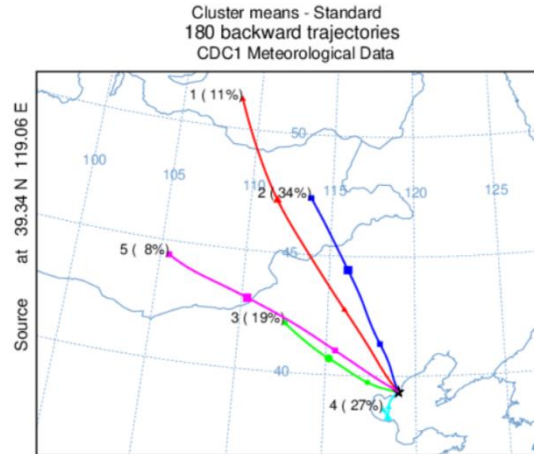

LT 2014winter

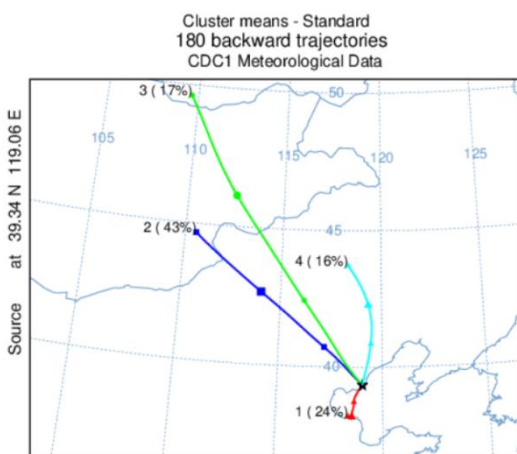

LT 2015winter

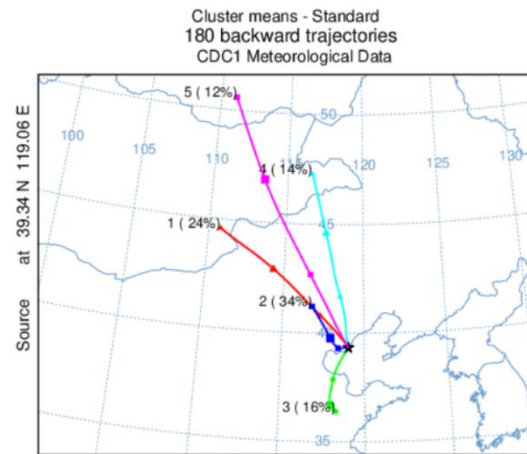

LT 2016winter



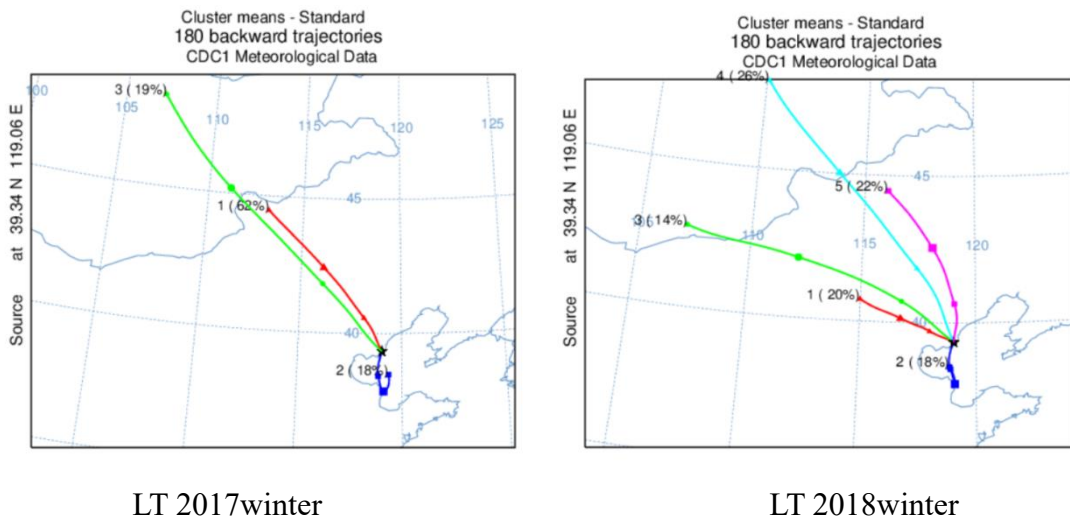

**Figure S4.** The backward trajectory by Hysplit model of the northern Bohai Sea sites in winter.

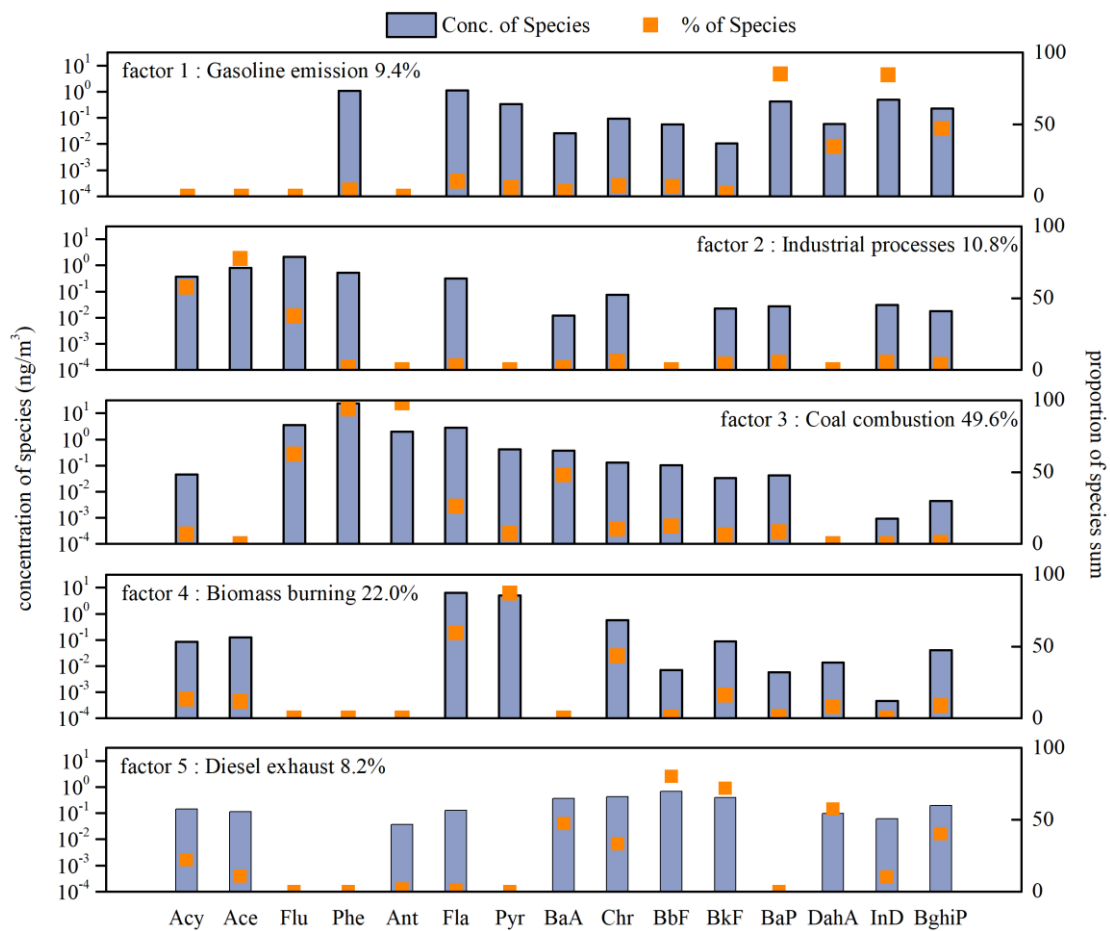

**Figure S5.** Factor profiles of PAHs by the PMF model.

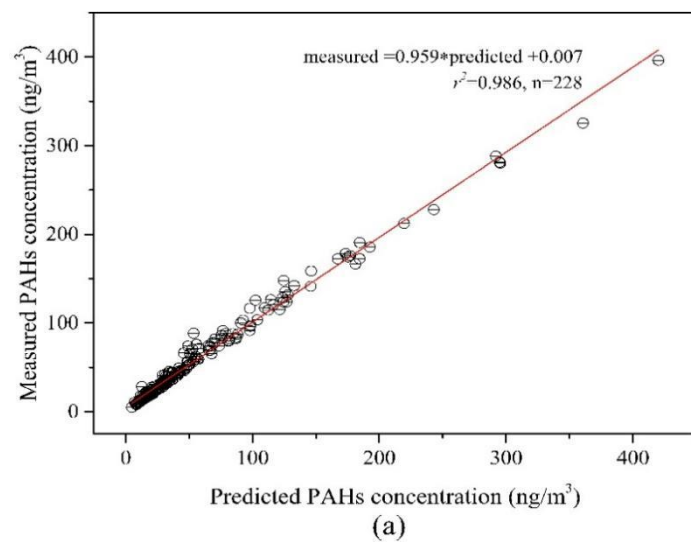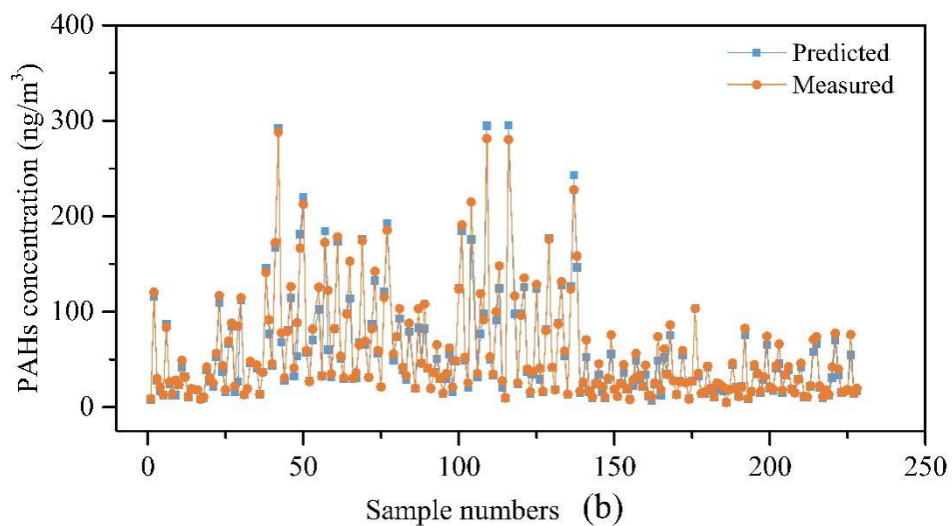

**Figure S6.** The relationship between predicted and measured concentrations of 228 samples analyzed by PMF (a) and (b).

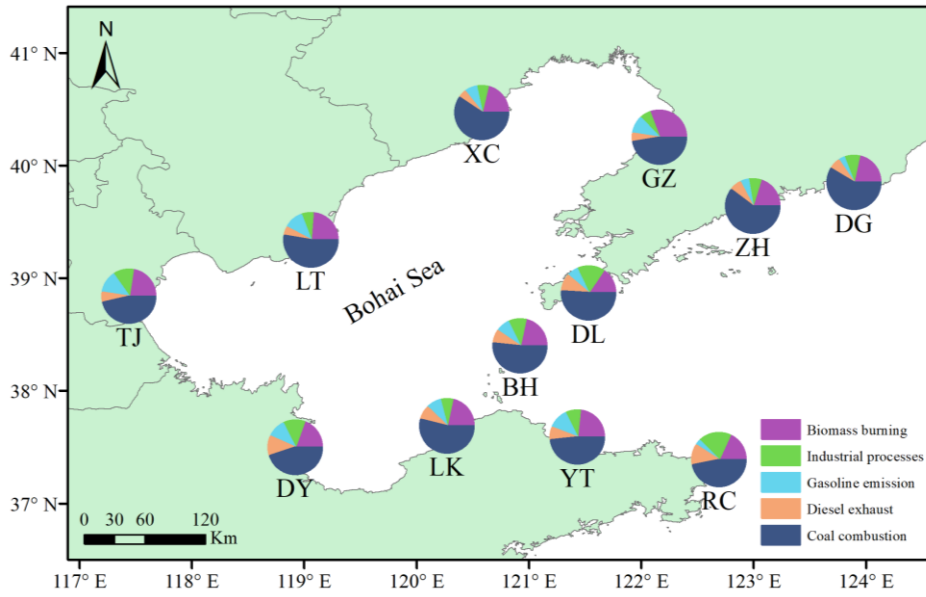

**Figure S7.** The average contributions of the five sources of PAHs at 12 sites around the BS.

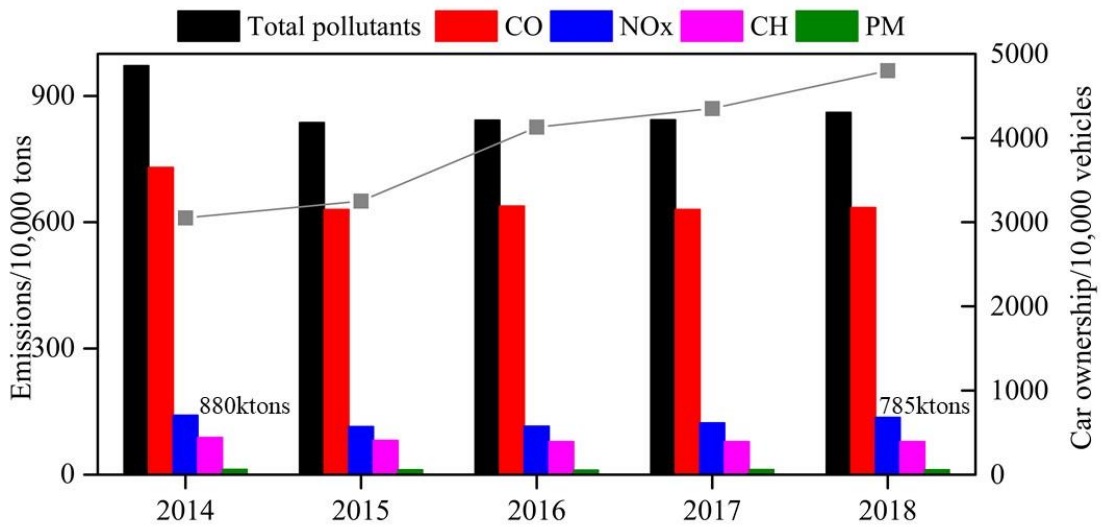

**Figure S8.** The pollutants emissions of motor vehicle around the BS within five years.

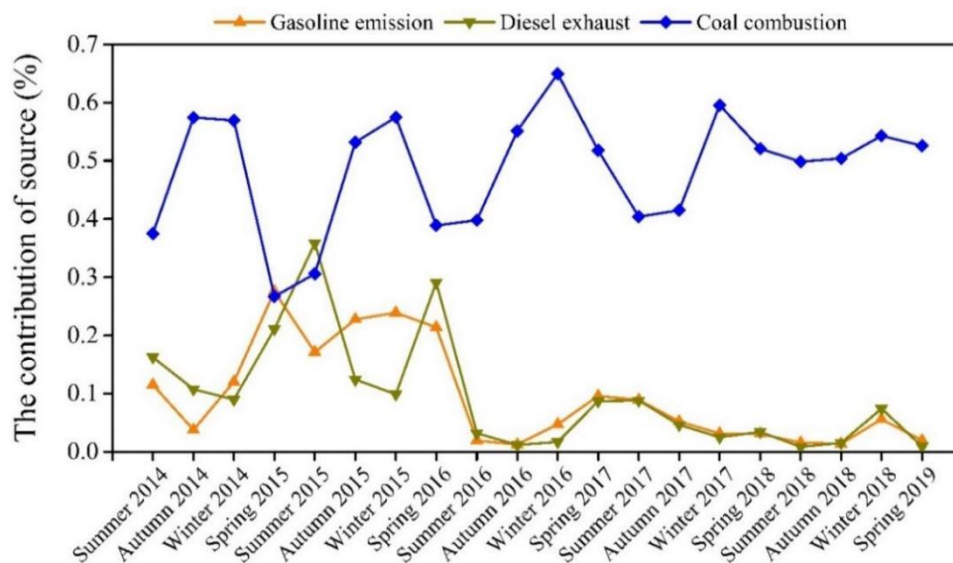

**Figure S9.** Seasonal contribution of coal combustion and vehicle emission for PAHs around the BS.

## References

- Chen, P.F., Li, C.L., Kang, S.C., Yan, F.P., Zhang, Q.G., Ji, Z.M., Tripathee, L., Rupakheti, D., Rupakheti, M., Qu, B., and Sillanpaa, M.: Source apportionment of particle-bound polycyclic aromatic hydrocarbons in Lumbini, Nepal by using the positive matrix factorization receptor model, *Atmos. Res.*, 182, 46–53, <https://doi.org/10.1016/j.atmosres.2016.07.011>, 2016.
- Chueinta, W., Hopke, P.K., and Paatero, P.: Investigation of sources of atmospheric aerosol at urban and suburban residential areas in Thailand by positive matrix factorization, *Atmos. Environ.*, 34, 3319–3329, [https://doi.org/10.1016/s1352-2310\(99\)00433-1](https://doi.org/10.1016/s1352-2310(99)00433-1), 2000.
- Gong, P., Wang, X.P., Sheng, J.J., Wang, H.L., Yuan, X.H., He, Y.Q., Qian, Y., and Yao, T.D.: Seasonal variations and sources of atmospheric polycyclic aromatic hydrocarbons and organochlorine compounds in a high-altitude city: Evidence from four-year observations, *Environ. Pollut.*, 233, 1188–1197, <https://doi.org/10.1016/j.envpol.2017.10.064>, 2018.
- Guariero, A.L.N., Santos, J.V.D., Eiguren-Fernandez, A., Torres, E.A., da Rocha, G.O., and de Andrade, J.B.: Redox activity and PAH content in size-classified nanoparticles emitted by a diesel engine fuelled with biodiesel and diesel blends, *Fuel.*, 116, 490–497, <https://doi.org/10.1016/j.fuel.2013.08.029>, 2014.
- He, L.Y., Hu, M., Zhang, Y.H., Huang, X.F., and Yao, T.T.: Fine particle emissions from on-road vehicles in the Zhujiang Tunnel, China, *Environ. Sci. Technol.*, 42, 4461–4466, <https://doi.org/10.1021/es7022658>, 2008.
- Huang, W., Huang, B., Bi, X.H., Lin, Q.H., Liu, M., Ren, Z.F., Zhang, G.H., Wang, X.M., Sheng, G.Y., and Fu, J.M.: Emission of PAHs, NPAHs and OPAHs from residential honeycomb coal briquette combustion, *Energ. Fuel.*, 28, 636–642. <https://doi.org/10.1021/ef401901d>, 2014.
- Jenkins, B.M., Jones, A.D., Turn, S.Q., and Williams, R.B.: Emission factors for polycyclic aromatic hydrocarbons from biomass burning, *Environ. Sci. Technol.*, 30, 2462–2469, <https://doi.org/10.1021/es950699m>, 1996.
- Kim, E., Hopke, P.K., Larson, T.V., and Covert, D.S.: Analysis of ambient particle size distributions using unmix and positive matrix factorization, *Environ. Sci. Technol.*, 38, 202–209, <https://doi.org/10.1021/es030310s>, 2004.
- Kong, S.F., Ji, Y.Q., Li, Z.Y., Lu, B., and Bai, Z.P.: Emission and profile characteristic of polycyclic aromatic hydrocarbons in PM<sub>2.5</sub> and PM<sub>10</sub> from stationary sources based on dilution sampling, *Atmos. Environ.*, 77, 155–165, <https://doi.org/10.1016/j.atmosenv.2013.04.073>, 2013.
- Ma, W.L., Li, Y.F., Qi, H., Sun, D.Z., Liu, L.Y., and Wang, D.G.: Seasonal variations of sources of

- polycyclic aromatic hydrocarbons (PAHs) to a northeastern urban city, China, *Chemosphere.*, 79, 441–447, <https://doi.org/10.1016/j.chemosphere.2010.01.048>, 2010.
- Nisbet, I.C.T., and Lagoy, P.K.: Toxic Equivalency Factors (TEFs) for Polycyclic Aromatic-Hydrocarbons (PAHS), *Regul. Toxicol. Pharm.*, 16, 290–300, [https://doi.org/10.1016/0273-2300\(92\)90009-x](https://doi.org/10.1016/0273-2300(92)90009-x), 1992.
- Ray, D., Chatterjee, A., Majumdar, D., Ghosh, S.K., and Raha, S.: Polycyclic aromatic hydrocarbons over a tropical urban and a high latitude Himalayan Station in India: Temporal variation and source apportionment, *Atmos. Res.*, 197, 331–341, <https://doi.org/10.1016/j.atmosres.2017.07.010>, 2017.
- Riddle, S.G., Jakober, C.A., Robert, M.A., Cahill, T.M., Charles, M.J., and Kleeman, M.J.: Large PAHs detected in fine particulate matter emitted from light-duty gasoline vehicles, *Atmos. Environ.*, 41, 8658–8668, <https://doi.org/10.1016/j.atmosenv.2007.07.023>, 2007.
- Shen, H., Huang, Y., Wang, R., Zhu, D., Li, W., Shen, G., Wang, B., Zhang, Y., Chen, Y., Lu, Y., Chen, H., Li, T., Sun, K., Li, B., Liu, W., Liu, J., and Tao, S.: Global atmospheric emissions of polycyclic aromatic hydrocarbons from 1960 to 2008 and future predictions, *Environ. Sci. Technol.*, 47, 6415–6424, <https://doi.org/10.1021/es400857z>, 2013.
- Tobiszewski, M., and Namiesnik, J.: PAH diagnostic ratios for the identification of pollution emission sources, *Environ. Pollut.*, 162, 110–119, <https://doi.org/10.1016/j.envpol.2011.10.025>, 2012.
- Wang, D.G., Tian, F.L., Yang, M., Liu, C.L., and Li, Y.F.: Application of positive matrix factorization to identify potential sources of PAHs in soil of Dalian, China, *Environ. Pollut.*, 157, 1559–1564, <https://doi.org/10.1016/j.envpol.2009.01.003>, 2009.
- Westerholm, R., Christensen, A., Tornqvist, M., Ehrenberg, L., Rannug, U., Sjogren, M., Rafter, J., Soontjens, C., Almen, J., and Gragg, K.: Comparison of exhaust emissions from Swedish environmental classified diesel fuel (MK1) and European Program on Emissions, Fuels and Engine Technologies (EPEFE) reference fuel: A chemical and biological characterization with viewpoints on cancer risk, *Environ. Sci. Technol.*, 35, 1748–1754, <https://doi.org/10.1021/es000113i>, 2001.
- Wu, D., Wang, Z.S., Chen, J.H., Kong, S.F., Fu, X., Deng, H.B., Shao, G.F., and Wu, G.: Polycyclic aromatic hydrocarbons (PAHs) in atmospheric PM<sub>2.5</sub> and PM<sub>10</sub> at a coal-based industrial city: Implication for PAH control at industrial agglomeration regions, China, *Atmos. Res.*, 149, 217–229, <https://doi.org/10.1016/j.atmosres.2014.06.012>, 2014.

- Yunker, M.B., Macdonald, R.W., Vingarzan, R., Mitchell, R.H., Goyette, D., and Sylvestre, S.: PAHs in the Fraser River basin: a critical appraisal of PAH ratios as indicators of PAH source and composition, *Org. Geochem.*, 33, 489–515, [https://doi.org/10.1016/s0146-6380\(02\)00002-5](https://doi.org/10.1016/s0146-6380(02)00002-5), 2002.
- Zhu, L.Z., Wang, J., Du, Y., and Xu, Q.Q.: Research on PAHs fingerprints of vehicle discharges, *Environmental Science (China)*, 3, 26–29, <https://doi.org/10.13227/j.hjcx.2003.03.005>, 2003.
- Zhu, Y., Yang, L., Yuan, Q., Yan, C., Dong, C., Meng, C., Sui, X., Yao, L., Yang, F., Lu, Y., and Wang, W.: Airborne particulate polycyclic aromatic hydrocarbon (PAH) pollution in a background site in the North China Plain: concentration, size distribution, toxicity and sources, *Sci. Total. Environ.*, 466-467, 357–368, <https://doi.org/10.1016/j.scitotenv.2013.07.030>, 2014.
